# Supplementary material for: Influence of reagent lots and multiple measuring systems on estimating the coefficient of variation from quality control data; implications for uncertainty estimation and interpretation of QC results
Source: publisher site journal article supplement (doi:10.1515/cclm-2020-0320), 2020-04-28
Supplement: Supplementary file 1 [file Supplemental Data.pdf › Supplement/Supplemental Data.pdf]

Influence of reagent lots and multiple measuring systems on estimating the coefficient of variation from quality control data; implications for uncertainty estimation and interpretation of QC results

### **Supplemental data**

#### **Outliers excluded**

Sodium results for PS for one week (137, 122 and 138 mmol/L with CV 6.8%) were removed as outliers with a non-representative CV.

ALT results for PS for one week (8, 9 and 12 U/L with CV 21.5%) were removed from the calculation of pooled CV as non-representative due to the low activity of the sample. PS results for ALT were missing for two weeks.

### **Supplemental figures**

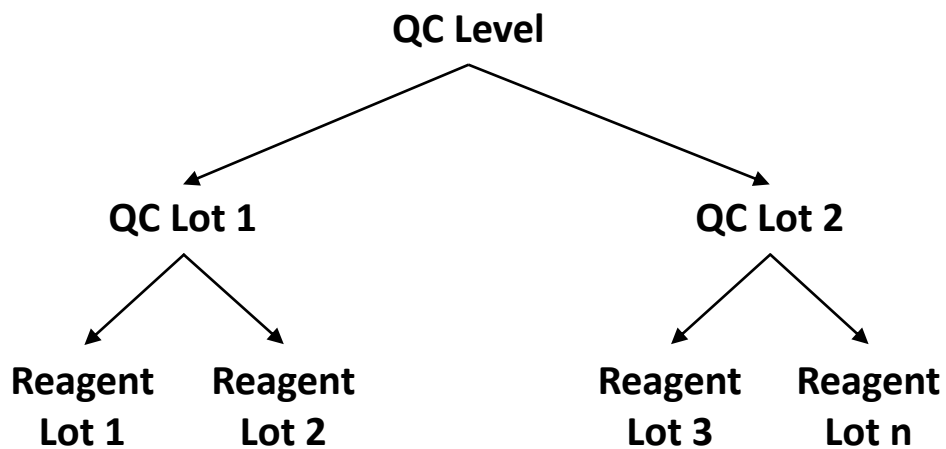

Figure S1. Partitioning diagram for QC and reagent lots.

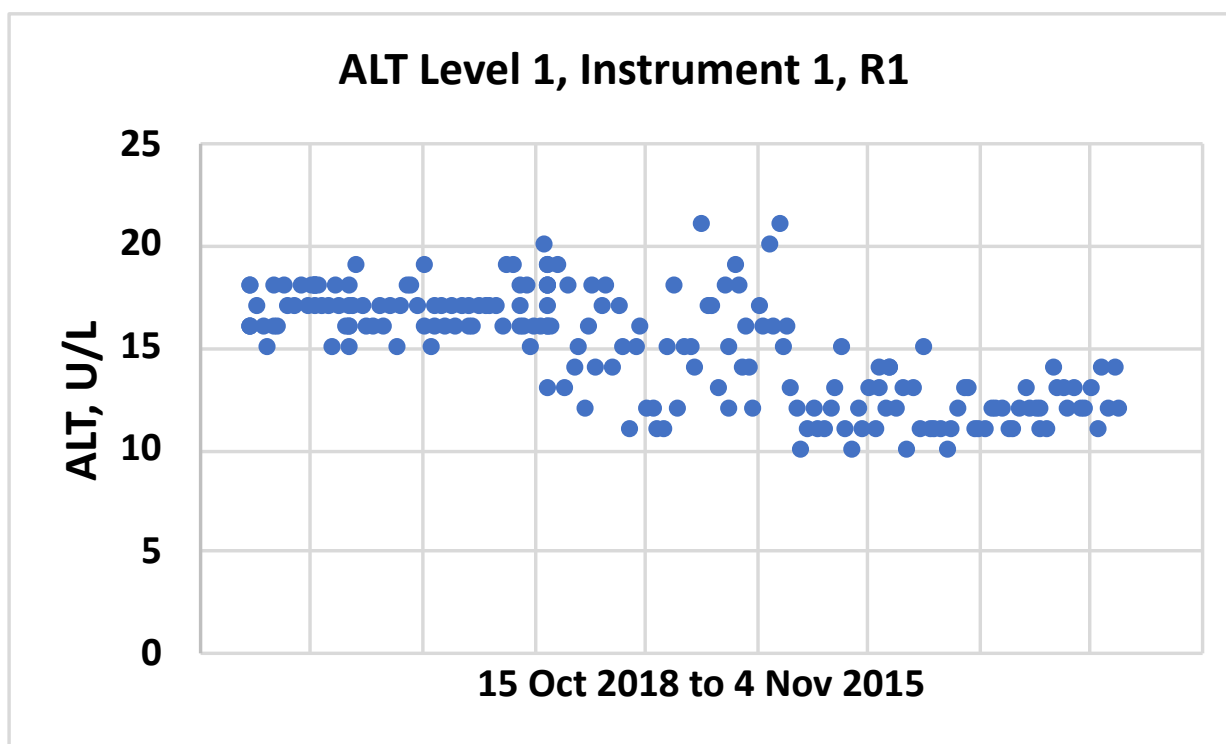

Figure S2. Levey-Jennings plot of QC level 1 ALT results for instrument #1 in partition R1.

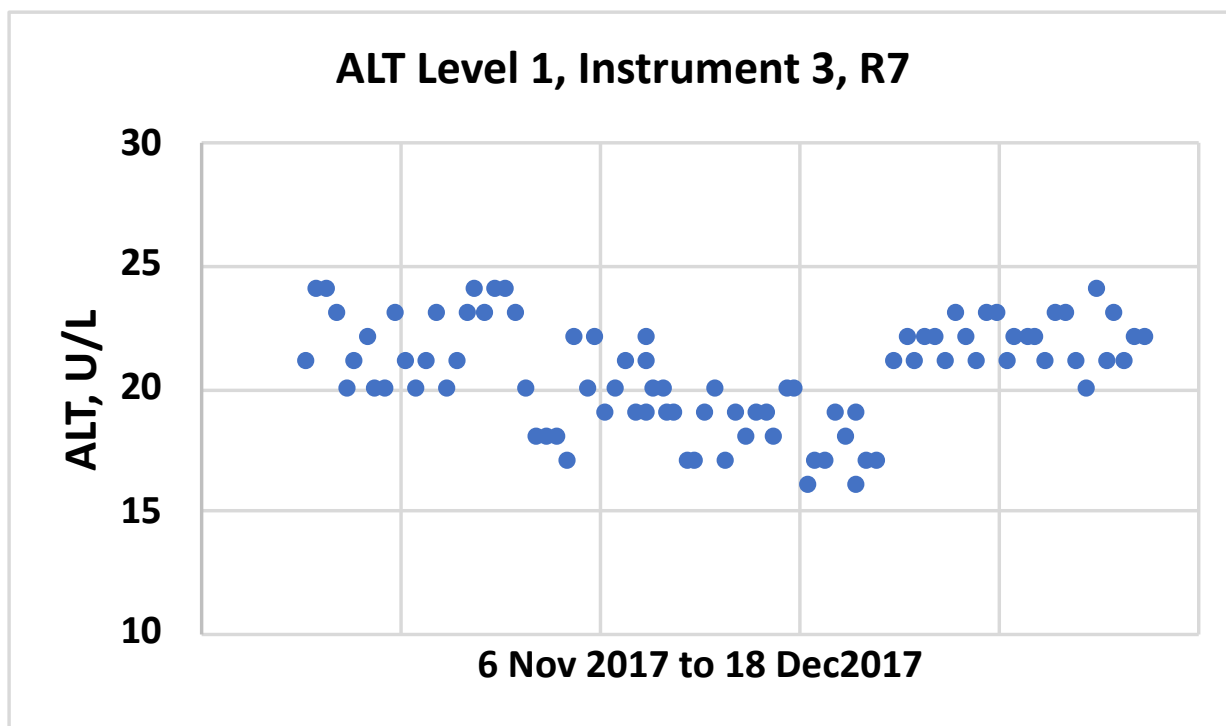

Figure S3. Levey-Jennings plot of QC level 1 ALT results for instrument #3 in partition R7.

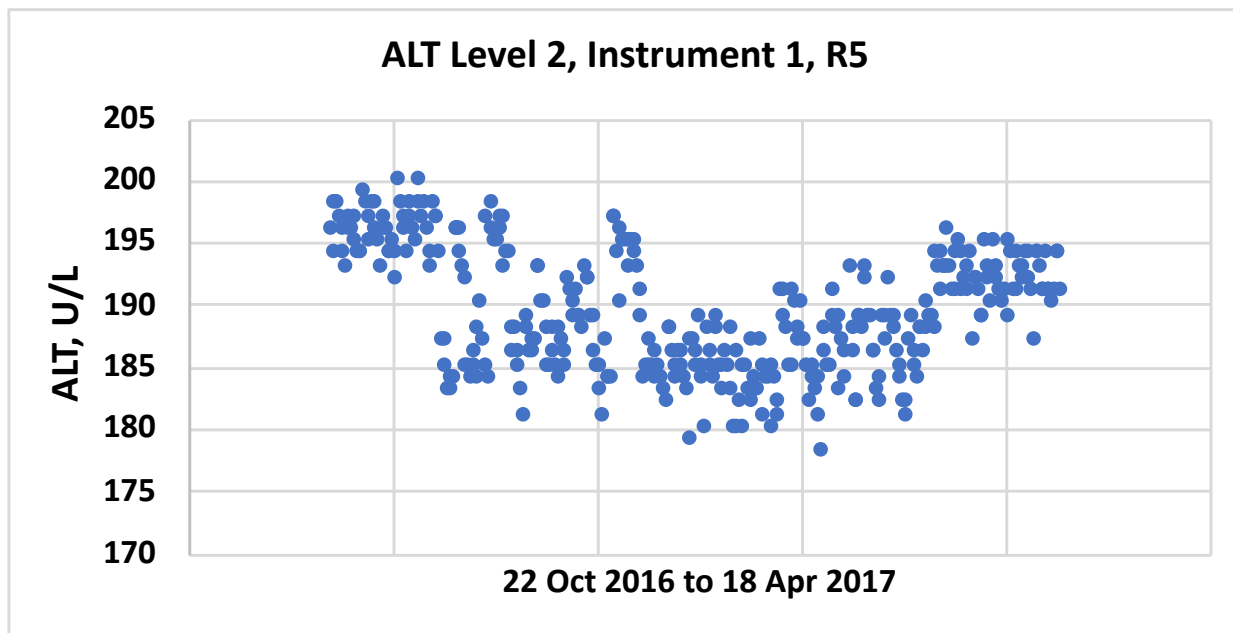

Figure S4. Levey-Jennings plot for ALT QC level 2, instrument 1, partition R5.

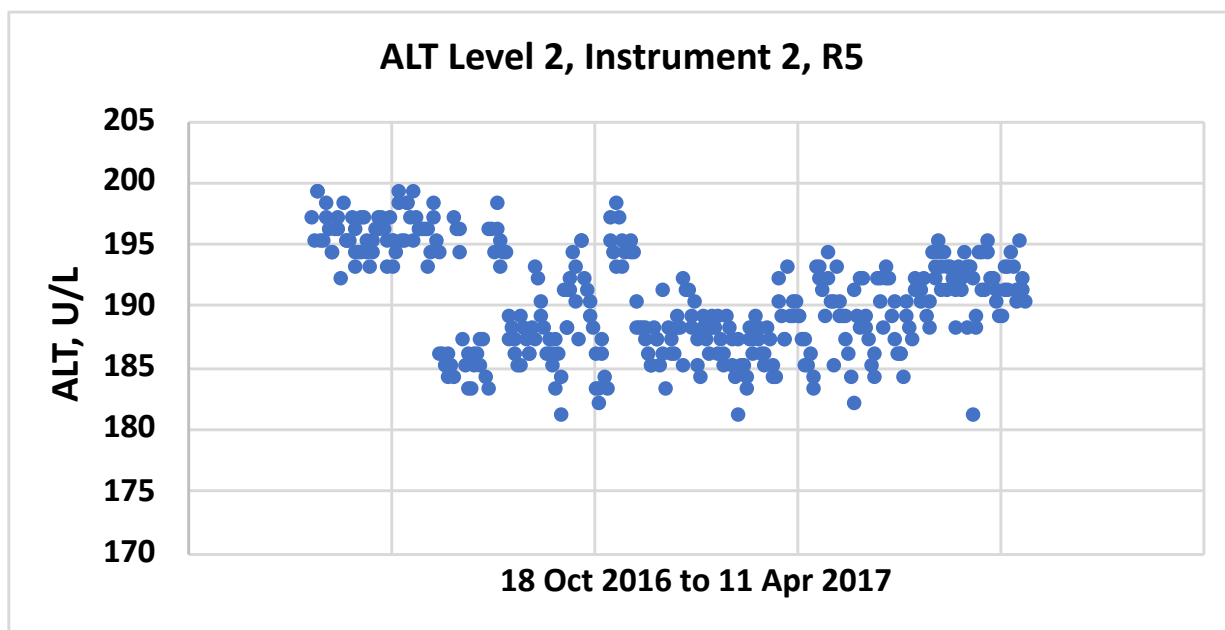

Figure S5. Levey-Jennings plot for ALT QC level 2, instrument 2, partition R5.

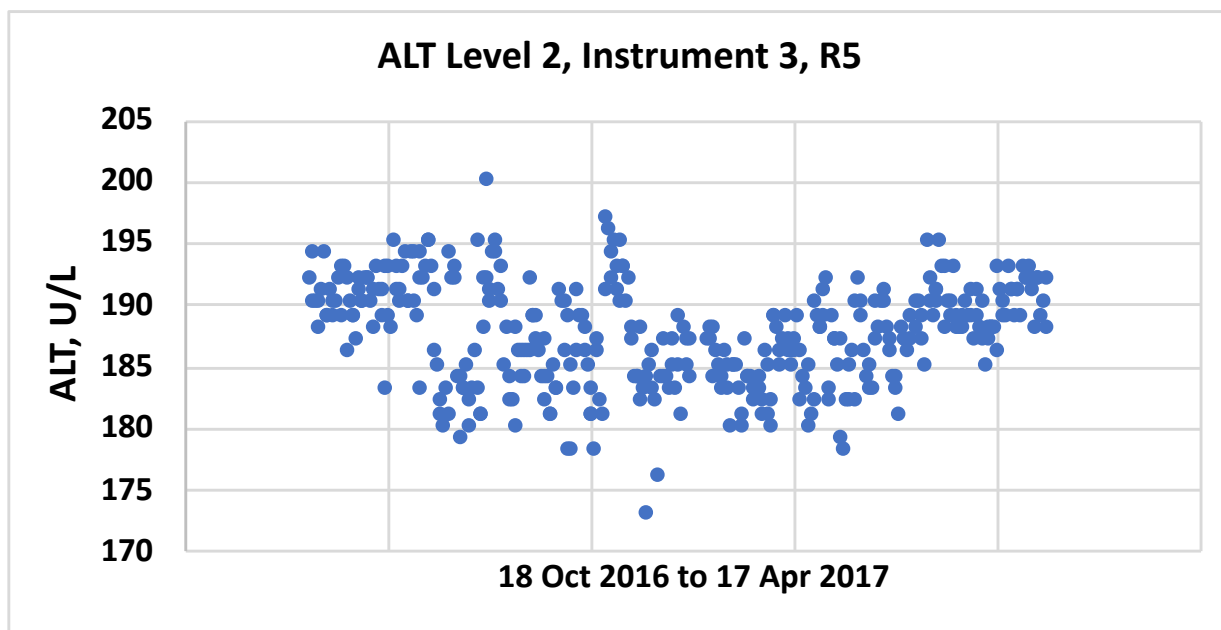

Figure S6. Levey-Jennings plot for ALT QC level 2, instrument 3, partition R5.

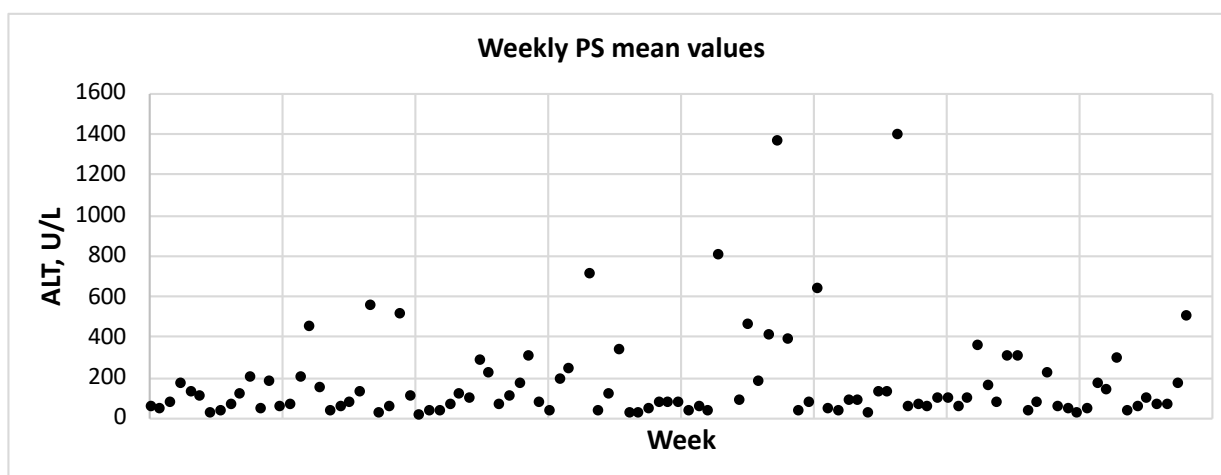

Figure S7A. Weekly mean results for ALT for pooled patient samples from 3 instruments, full activity range.

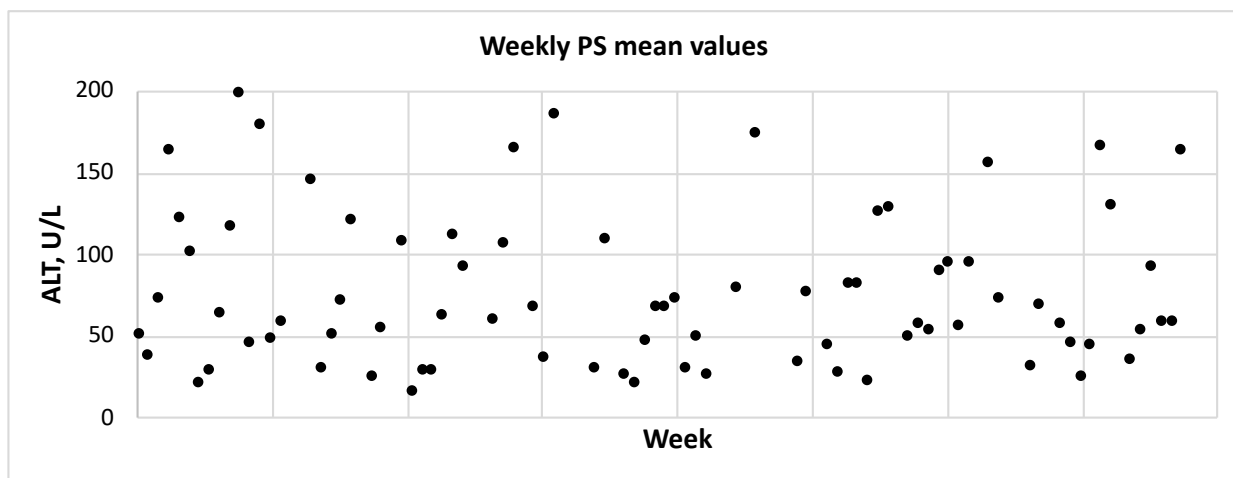

Figure S7B. Weekly mean results for ALT for pooled patient samples from 3 instruments, activity 0-200 U/L.

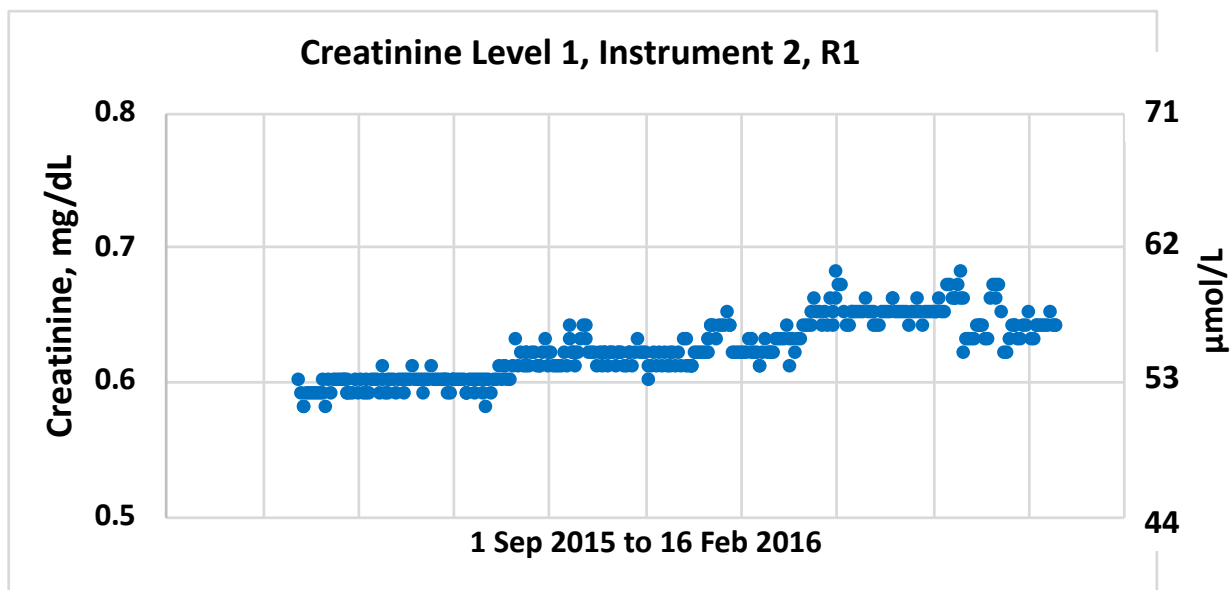

Figure S8. Levey-Jennings plot for creatinine QC level 1, instrument 2, partition R1.

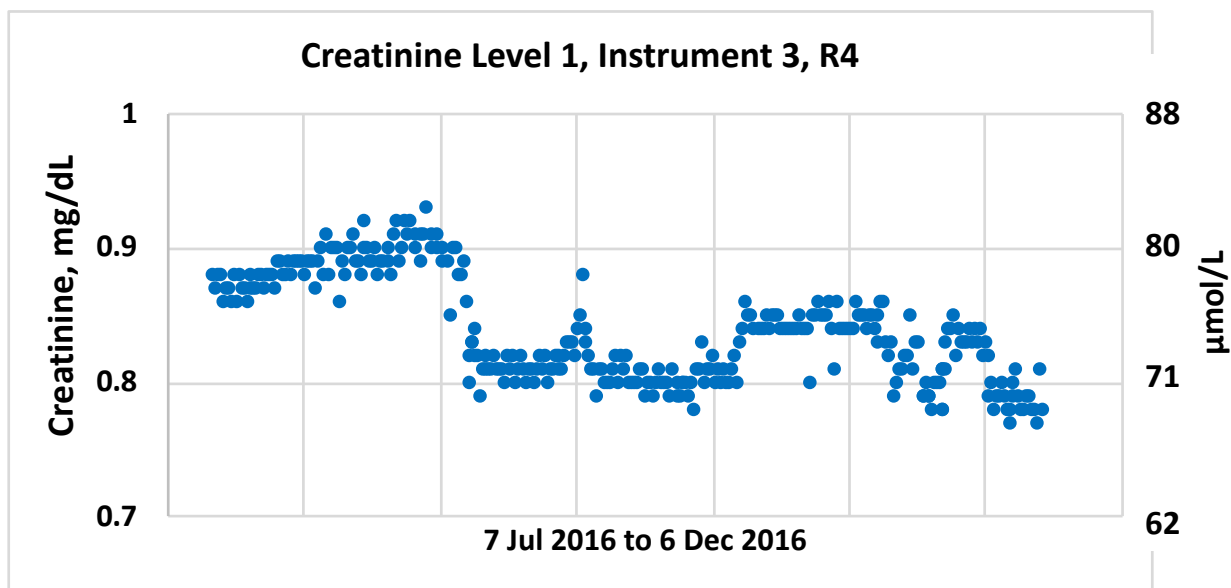

Figure S9. Levey-Jennings plot of QC level 1 creatinine results for instrument 3 in partition R4.

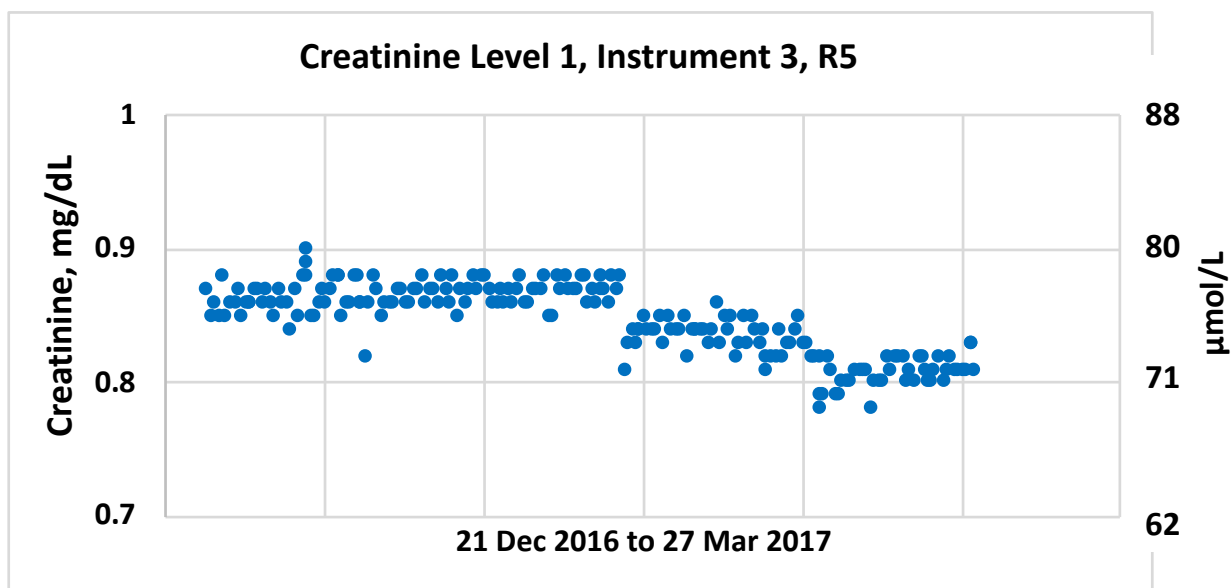

Figure S10. Levey-Jennings plot of QC level 1 creatinine results for instrument 3 in partition R5.

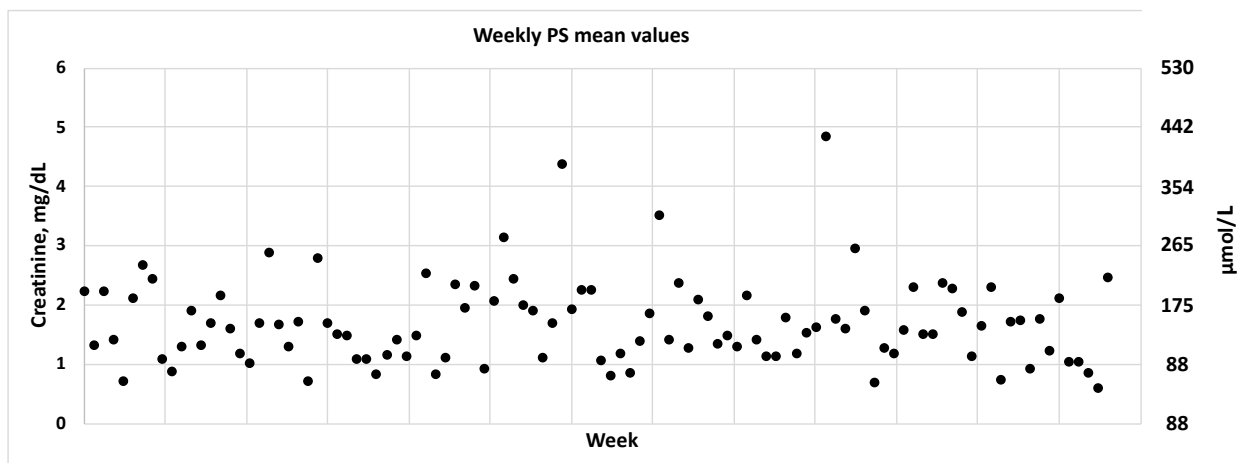

Figure S11. Weekly mean results from 3 instruments for creatinine for pooled patient samples.
