# Supplementary material for: Influence of reagent lots and multiple measuring systems on estimating the coefficient of variation from quality control data; implications for uncertainty estimation and interpretation of QC results
Source: publisher site journal article supplement (doi:10.1515/cclm-2020-0320), 2020-04-28
Supplement: Supplementary file 1 [file Supplemental Table S1.xlsx]

## Sheet: Table S1
		Data for quality control (QC) samples															Pooled values within an instrument for all QC and reagent lots				Pooled values for all instruments, QC and reagent lots				Data for weekly pooled patient samples measured by each instrument
Analyte	Instrument	QC level	Time interval	QC lot	Reagent Lot	Number of values	Min value, SI units	Max value, SI units	Mean, SI units	Min value, conventional units	Max value, conventional units	Mean, conventional units	CV %	CV %, lower 95% confidence limit	CV %, upper 95% confidence limit		Pooled CV%	Pooled CV %, lower 95% confidence limit	Pooled CV %, upper 95% confidence limit		Pooled CV%	Pooled CV %, lower 95% confidence limit	Pooled CV %, upper 95% confidence limit		N weeks	Min value weekly mean	Max value weekly mean	Average CV%	Average CV %, lower 95% confidence limit	Average CV %, upper 95% confidence limit
ALT, U/L	1	1	8/18/15-11/12/15	1	1	196	10	21	14.9949				17.8244	16.2172	19.7878		8.35084	8.07304	8.64859		6.44011	6.31401	6.57138		103	15.7	1387	1.18793	0.991501	1.41674
		1	11/12/15-3/22/16	1	2	256	11	25	14				7.86104	7.23397	8.60806
		1	3/22/16-4/30/16	2	3	66	21	27	23.2				5.56808	4.75374	6.72172
		1	4/30/16-10/14/16	2	4	308	20	27	24.0292				4.35849	4.03933	4.73285
		1	10/14/16-4/26/17	2	5	364	18	25	21.5769				5.82205	5.42761	6.2788
		1	4/26/17-11/8/17	2	6	382	20	26	22.5471				4.90843	4.5833	5.2836
		1	11/8/17-12/13/17	2	7	56	18	25	21.4				6.34566	5.34986	7.80044
ALT, U/L	2	1	8/18/15-11/12/15	1	1	187	13	18	14.97				6.19271	5.62225	6.89302		4.69328	4.53625	4.86164
		1	11/12/15-3/22/16	1	2	249	13	18	14.89				5.04673	4.63898	5.53368
		1	3/22/16-4/30/16	2	3	63	22	26	23.86				3.09096	2.62976	3.74985
		1	4/30/16-10/10/16	2	4	301	20	26	23.68				3.62401	3.35579	3.9392
		1	10/10/16-4/27/17	2	5	377	14	26	21.74				5.51196	5.1446	5.93626
		1	4/27/17-10/31/17	2	6	350	21	26	22.87				3.76523	3.50542	4.06694
		1	10/31/17-12/18/17	2	7	82	20	24	22.09				4.28084	3.71104	5.05899
ALT, U/L	3	1	8/18/15-11/12/15	1	1	164	13	18	15.63				6.9503	6.27074	7.79634		5.85902	5.66234	6.06995
		1	11/12/15-3/22/16	1	2	254	12	18	14.43				6.31744	5.81167	6.92037
		1	3/22/16-05/03/16	2	3	71	22	26	24.01				3.48354	2.98989	4.17396
		1	05/03/16-10/10/16	2	4	293	21	28	23.83				4.64317	4.29519	5.05298
		1	10/10/16-4/24/17	2	5	383	14	25	21.21				6.33361	5.91459	6.81702
		1	4/24/17-10/29/17	2	6	345	19	25	22.02				4.37216	4.06845	4.72526
		1	10/29/17-12/18/17	2	7	88	16	24	20.53				10.2565	8.9329	12.0443
ALT, U/L	1	2	8/18/15-11/12/15	1	1	184	184	199	191.27				1.82768	1.65807	2.03624		1.78801	1.7281	1.85226		1.68583	1.65263	1.7204
		2	11/12/15-3/22/16	1	2	255	181	197	189.09				1.62458	1.49476	1.7793
		2	3/22/16-4/30/16	2	3	66	189	200	194.36				1.12951	0.964316	1.36353
		2	4/30/16-10/14/16	2	4	302	183	203	195.9				1.38939	1.28671	1.51001
		2	10/14/16-4/26/17	2	5	360	178	200	189.38				2.57403	2.39874	2.77718
		2	4/26/17-11/8/17	2	6	369	179	197	189.26				1.37094	1.27865	1.4777
		2	11/8/17-12/13/17	2	7	68	177	186	181.38				1.2957	1.10862	1.55931
ALT, U/L	2	2	8/18/15-11/12/15	1	1	190	186	199	191.23				1.276	1.1593	1.41902		1.6507	1.59521	1.71023
		2	11/12/15-3/22/16	1	2	255	184	197	190.56				1.3863	1.27551	1.51832
		2	3/22/16-4/30/16	2	3	63	190	200	195.17				1.2769	1.08637	1.54909
		2	4/30/16-10/10/16	2	4	301	185	202	196.06				1.55067	1.4359	1.68554
		2	10/10/16-4/27/17	2	5	360	181	199	190.17				2.2266	2.07497	2.40233
		2	4/27/17-10/31/17	2	6	351	178	203	191.76				1.59327	1.48348	1.72074
		2	10/31/17-12/18/17	2	7	73	181	187	183.99				0.776581	0.667849	0.927935
ALT, U/L	3	2	8/18/15-11/12/15	1	1	164	181	229	191.44				1.42432	1.28505	1.59769		1.61203	1.55765	1.67037
		2	11/12/15-3/22/16	1	2	247	182	195	189.55				1.22812	1.12853	1.34715
		2	3/22/16-05/03/16	2	3	70	184	199	193.94				1.23175	1.05613	1.47799
		2	05/03/16-10/10/16	2	4	294	178	206	193.41				1.57274	1.45506	1.7113
		2	10/10/16-4/24/17	2	5	375	173	200	187.5				2.22068	2.0723	2.39211
		2	4/24/17-10/29/17	2	6	347	181	194	188.75				1.32148	1.22993	1.42787
		2	10/29/17-12/18/17	2	7	85	172	184	179.72				1.20083	1.04349	1.41449
Creatinine, µmol/L	1	1	9/1/15-2/13/16	1	1	346	52.156	59.228	54.808	0.59	0.67	0.62	1.93188	1.79786	2.08765		1.7862	1.72247	1.85487		2.35713	2.30801	2.40841		106	0.587	4.816	1.01884	0.896314	1.15391
(mg/dL)		1	2/13/16-3/22/16	1	2	53	56.576	60.112	57.8136	0.64	0.68	0.654	1.38205	1.16003	1.70998
		1	3/22/16-7/4/16	2	3	181	74.256	78.676	76.466	0.84	0.89	0.865	1.08544	0.983959	1.21045
		1	7/4/16-12/13/16	2	4	305	70.72	77.792	74.1676	0.8	0.88	0.839	1.77894	1.64808	1.93255
		1	12/13/16-3/31/17	2	5	188	70.72	76.908	73.9908	0.8	0.87	0.837	1.79238	1.62767	1.99447
		1	3/31/17-8/1/2017	2	6	226	71.604	77.792	74.698	0.81	0.88	0.845	2.13271	1.95255	2.34979
		1	8/1/2017-9/30/2017	2	7	110	70.72	76.908	74.0792	0.8	0.87	0.838	1.69625	1.49787	1.95568
Creatinine, µmol/L	2	1	9/1/15-2/13/16	1	1	341	51.272	60.112	54.9848	0.58	0.68	0.622	3.57036	3.32099	3.86053		2.23316	2.15397	2.31844
(mg/dL)		1	2/13/16-3/22/16	1	2	55	56.576	60.112	57.9904	0.64	0.68	0.656	1.15434	0.971794	1.42196
		1	3/22/16-6/28/16	2	3	172	76.024	80.444	77.8804	0.86	0.91	0.881	0.973291	0.880161	1.08864
		1	6/28/16-12/14/16	2	4	316	71.604	79.56	73.5488	0.81	0.9	0.832	1.72791	1.60287	1.87426
		1	12/14/16-4/3/17	2	5	197	69.836	76.908	73.814	0.79	0.87	0.835	1.47489	1.34221	1.6369
		1	4/3/17-8/2/17	2	6	223	69.836	83.096	74.7864	0.79	0.94	0.846	2.13047	1.94939	2.34893
		1	8/2/17-10/9/17	2	7	123	70.72	78.676	72.2228	0.8	0.89	0.817	1.32187	1.17477	1.5114
Creatinine, µmol/L	3	1	9/1/15-2/13/16	1	1	327	53.924	60.112	56.2224	0.61	0.68	0.636	2.51352	2.33451	2.72249		2.91461	2.81112	3.02608
(mg/dL)		1	2/13/16-3/22/16	1	2	51	56.576	60.112	57.7252	0.64	0.68	0.653	1.22859	1.02798	1.52724
		1	3/22/16-6/29/16	2	3	171	74.256	79.56	76.6428	0.84	0.9	0.867	1.30454	1.17938	1.45964
		1	6/29/16-12/13/16	2	4	324	68.068	82.212	74.0792	0.77	0.93	0.838	4.57577	4.24848	4.95811
		1	12/13/16-4/3/17	2	5	207	68.952	79.56	74.7864	0.78	0.9	0.846	3.1237	2.84899	3.4575
		1	4/3/17-7/30/17	2	6	213	70.72	76.908	72.6648	0.8	0.87	0.822	1.77301	1.61911	1.95949
		1	7/30/17-10/10/17	2	7	130	71.604	76.024	73.1952	0.81	0.86	0.828	1.20707	1.07603	1.37473
Creatinine, µmol/L	1	3	9/1/15-2/13/16	1	1	341	583.44	609.96	600.148	6.6	6.9	6.789	1.01677	0.945756	1.09941		0.924365	0.89135	0.959938		0.933777	0.914313	0.954093
(mg/dL)		3	2/13/16-3/22/16	1	2	54	592.28	618.8	602.358	6.7	7	6.814	0.727584	0.611625	0.898213
		3	3/22/16-7/4/16	2	3	181	609.96	627.64	621.452	6.9	7.1	7.03	0.838764	0.760344	0.935362
		3	7/4/16-12/13/16	2	4	304	601.12	636.48	623.132	6.8	7.2	7.049	0.935333	0.866423	1.01624
		3	12/13/16-3/31/17	2	5	187	601.12	627.64	611.64	6.8	7.1	6.919	0.894087	0.811725	0.995195
		3	3/31/17-8/1/17	2	6	227	609.96	627.64	619.242	6.9	7.1	7.005	0.692878	0.634464	0.763231
		3	8/1/17-9/30/17	2	7	112	601.12	627.64	615.441	6.8	7.1	6.962	1.22986	1.08718	1.41601
Creatinine, µmol/L	2	3	9/1/15-2/13/16	1	1	345	592.28	627.64	605.982	6.7	7.1	6.855	0.787558	0.73285	0.85116		0.890032	0.85846	0.924033
(mg/dL)		3	2/13/16-3/22/16	1	2	49	601.12	627.64	610.314	6.8	7.1	6.904	0.7126	0.594253	0.890251
		3	3/22/2016-6/28/16	2	3	172	618.8	645.32	627.021	7	7.3	7.093	0.609692	0.551353	0.681946
		3	6/28/16-12/14/16	2	4	319	592.28	636.48	622.778	6.7	7.2	7.045	0.951062	0.882543	1.0312
		3	12/14/16-4/3/17	2	5	195	601.12	627.64	612.877	6.8	7.1	6.933	0.768312	0.698875	0.853189
		3	4/3/17-8/2/17	2	6	222	601.12	627.64	615.883	6.8	7.1	6.967	1.2752	1.16659	1.40629
		3	8/2/2017-10/10/17	2	7	124	601.12	627.64	618.535	6.8	7.1	6.997	0.720718	0.640808	0.823576
Creatinine, µmol/L	3	3	9/1/15-2/13/16	1	1	327	583.44	618.8	599.882	6.6	7	6.786	1.00837	0.936553	1.0922		0.985388	0.950434	1.02303
(mg/dL)		3	2/13/16-3/22/16	1	2	50	592.28	609.96	600.324	6.7	6.9	6.791	0.635604	0.530941	0.792047
		3	3/22/16-6/29/16	2	3	171	601.12	636.48	618.358	6.8	7.2	6.995	0.63866	0.577388	0.714596
		3	6/29/16-12/13/16	2	4	328	592.28	636.48	615.352	6.7	7.2	6.961	1.05454	0.97954	1.14207
		3	12/13/16-4/3/17	2	5	202	583.44	627.64	612.877	6.6	7.1	6.933	1.1174	1.01803	1.23844
		3	4/3/17-7/30/17	2	6	217	592.28	627.64	613.938	6.7	7.1	6.945	1.10124	1.00646	1.21588
		3	7/30/17-10/10/17	2	7	131	601.12	636.48	620.214	6.8	7.2	7.016	0.799201	0.71274	0.909723
Glucose, mmol/L	1	1	8/18/15-12/24/15	1	1	276	3.3306	3.60815	3.47104	60	65	62.53	1.46527	1.35237	1.59888		1.57934	1.52686	1.63558		1.5485	1.51838	1.57985		106	87.3	236.3	1.12213	1.01697	1.22729
(mg/dL)		1	12/24/15-3/22/16	1	2	169	3.16407	3.44162	3.31839	57	62	59.78	1.58843	1.43522	1.77854
		1	3/22/16-6/27/16	2	3	170	3.21958	3.38611	3.29618	58	61	59.38	0.987787	0.892767	1.10562
		1	6/27/16-1/6/17	2	4	366	3.21958	3.49713	3.34281	58	63	60.22	1.42043	1.32444	1.53153
		1	1/6/17-6/22/17	2	5	306	3.16407	3.44162	3.30229	57	62	59.49	1.65168	1.53036	1.79405
		1	6/22/17-12/13/17	2	6	344	3.10856	3.38611	3.24622	56	61	58.48	1.967	1.83018	2.1261
Glucose, mmol/L	2	1	8/8/15-01/01/16	1	1	292	3.38611	3.55264	3.46771	61	64	62.47	1.20438	1.11398	1.31088		1.47501	1.42626	1.52723
(mg/dL)		1	01/01/16-03/22/16	1	2	148	3.27509	3.49713	3.37168	59	63	60.74	1.31816	1.18316	1.48821
		1	3/22/16-7/6/16	2	3	203	3.21958	3.44162	3.36335	58	62	60.59	1.20154	1.09492	1.33133
		1	7/6/16-1/10/17	2	4	358	3.27509	3.55264	3.37057	59	64	60.72	1.47145	1.37098	1.58793
		1	1/10/17-7/6/17	2	5	334	3.21958	3.49713	3.33837	58	63	60.14	1.63779	1.52229	1.7724
		1	7/6/17-12/13/17	2	6	314	3.10856	3.55264	3.27676	56	64	59.03	1.74431	1.61772	1.89257
Glucose, mmol/L	3	1	8/8/15-01/02/16	1	1	265	3.38611	3.55264	3.44995	61	64	62.15	1.17988	1.08725	1.28989		1.58974	1.53669	1.6466
(mg/dL)		1	01/02/16-03/22/16	1	2	147	3.27509	3.55264	3.3467	59	64	60.29	1.55553	1.39574	1.75698
		1	3/22/16-7/7/16	2	3	199	3.27509	3.44162	3.33671	59	62	60.11	1.06271	0.967554	1.17879
		1	7/7/16-1/5/17	2	4	357	3.27509	3.66366	3.37889	59	66	60.87	1.80891	1.68524	1.95232
		1	1/5/17-7/6/17	2	5	336	3.21958	3.44162	3.33837	58	62	60.14	1.43964	1.3384	1.55758
		1	7/6/17-12/13/17	2	6	313	3.10856	3.49713	3.30285	56	63	59.5	2.02328	1.87622	2.19555
Glucose, mmol/L	1	2	8/18/15-12/24/15	1	1	268	19.595	21.1493	20.5304	353	381	369.85	1.48175	1.36602	1.61907		1.31823	1.27438	1.36523		1.33567	1.30958	1.36282
(mg/dL)		2	12/24/15-3/22/16	1	2	168	19.5395	20.9273	20.3	352	377	365.7	1.27296	1.14985	1.42583
		2	3/22/16-6/27/16	2	3	177	19.7616	20.7607	20.3999	356	374	367.5	0.820524	0.743026	0.916212
		2	6/27/16-1/6/17	2	4	365	19.706	21.3713	20.6131	355	385	371.34	1.19869	1.11759	1.29259
		2	1/6/17-6/22/17	2	5	307	19.8171	21.2603	20.3977	357	383	367.46	1.06703	0.98877	1.15883
		2	6/22/17-12/13/17	2	6	342	19.373	21.2048	20.33	349	382	366.24	1.68926	1.57144	1.82633
Glucose, mmol/L	2	2	8/8/15-01/01/16	1	1	288	19.8726	21.1493	20.6392	358	381	371.81	1.22795	1.13519	1.33735		1.30737	1.26387	1.354
(mg/dL)		2	01/01/16-03/22/16	1	2	150	20.0391	21.2603	20.6342	361	383	371.72	1.26685	1.13789	1.42904
		2	3/22/16-7/6/16	2	3	201	20.3167	21.3158	20.8418	366	384	375.46	0.799895	0.728597	0.886782
		2	7/6/16-1/10/17	2	4	358	19.8726	21.5934	20.824	358	389	375.14	1.21055	1.1279	1.30638
		2	1/10/17-7/6/17	2	5	314	19.9836	21.4824	20.637	360	387	371.77	1.53466	1.42329	1.6651
		2	7/6/17-12/13/17	2	6	315	19.595	21.5934	20.6397	353	389	371.82	1.5092	1.39983	1.63725
Glucose, mmol/L	3	2	8/8/15-01/02/16	1	1	267	19.9281	20.9273	20.4066	359	377	367.62	0.877614	0.808953	0.95911		1.37985	1.33361	1.42943
(mg/dL)		2	01/02/16-03/22/16	1	2	142	20.0391	21.3713	20.5742	361	385	370.64	1.24257	1.11292	1.40668
		2	3/22/16-7/7/16	2	3	199	20.0391	21.1493	20.622	361	381	371.5	1.04949	0.955513	1.16412
		2	7/7/16-1/5/17	2	4	350	19.9836	22.0375	20.7891	360	397	374.51	1.30305	1.21314	1.40747
		2	1/5/17-7/6/17	2	5	331	21.3713	21.2048	20.5426	385	382	370.07	1.22597	1.13915	1.32723
		2	7/6/17-12/13/17	2	6	314	19.6505	21.7044	20.6664	354	391	372.3	2.04482	1.89642	2.21862
Sodium, mmol/L	1	1	9/1/15-10/19/15	1	1	121	112	117	114.3				0.898232	0.797545	1.02824		0.892604	0.862604	0.924781		0.898851	0.880994	0.917453		105	125.3	148.7	0.768142	0.670517	0.854689
		1	10/19/15-1/20/16	1	2	196	111	116	113.25				0.947969	0.862496	1.0524
		1	1/20/16-3/22/16	1	3	134	110	118	113.4				1.04348	0.931733	1.18593
		1	3/22/16-5/24/16	2	4	141	112	117	114.5				0.925289	0.828438	1.04799
		1	5/24/16-9/11/16	2	5	224	111	117	114.2				0.81906	0.749585	0.902838
		1	9/11/16-12/12/16	2	6	186	112	120	114.4				0.967358	0.878029	1.07708
		1	12/12/16-3/22/17	2	7	203	111	118	114.8				0.947112	0.863073	1.04942
		1	3/22/17-7/10/17	2	8	225	113	117	115				0.724918	0.663554	0.798885
		1	7/10/17-11/13/17	2	9	166	113	118	114.8				0.803631	0.725487	0.90079
Sodium, mmol/L	2	1	9/1/15-11/20/15	1	1	175	110	116	114				0.819885	0.742047	0.916111		0.801178	0.774244	0.830067
		1	11/20/15-2/6/16	1	2	168	110	116	113.4				0.914125	0.825718	1.0239
		1	2/6/16-3/22/16	1	3	91	111	117	114.1				0.908939	0.79335	1.06426
		1	3/22/16-5/23/16	2	4	131	111	116	114.5				0.939419	0.837789	1.06933
		1	5/23/16-9/13/16	2	5	230	113	117	114.3				0.669404	0.613309	0.736882
		1	9/13/16-3/2/17	2	6	345	112	117	114.6				0.760579	0.707745	0.822002
		1	3/2/17-6/20/17	2	7	223	113	118	115.2				0.766041	0.700931	0.844591
		1	6/20/17-9/12/17	2	8	169	113	118	114.7				0.683315	0.617408	0.765099
		1	9/12/17-10/10/17	2	9	63	111	117	114.4				1.00216	0.852627	1.21579
Sodium, mmol/L	3	1	9/1/15-11/5/15	1	1	136	109	116	114.2				0.897513	0.802033	1.019		0.997576	0.963132	1.03459
		1	11/5/15-2/2/16	1	2	196	110	117	113.9				0.968222	0.880922	1.07488
		1	2/2/16-3/22/16	1	3	103	111	116	113.3				0.923495	0.812297	1.07024
		1	3/22/2016-4/19/16	2	4	54	109	117	113.5				1.34505	1.13068	1.66048
		1	4/19/16-8/18/16	2	5	248	112	119	114.6				0.884903	0.813275	0.970476
		1	8/18/16-11/10/16	2	6	177	108	116	114.1				1.00104	0.906497	1.11779
		1	11/10/16-5/26/17	2	7	238	109	117	114.4				1.07167	0.98326	1.17767
		1	5/26/17-8/28/17	2	8	171	112	119	115.1				1.04581	0.945476	1.17016
		1	8/28/17-12/5/17	2	9	187	110	121	114.3				1.01612	0.922513	1.13102
Sodium, mmol/L	1	3	9/1/15-10/19/15	1	1	116	157	166	160				0.792466	0.701949	0.909996		0.754636	0.729235	0.781884		0.745936	0.731095	0.761397
		3	10/19/15-1/20/16	1	2	195	154	161	157.5				0.892798	0.81211	0.991427
		3	1/20/16-3/22/16	1	3	137	156	163	159.6				0.795746	0.71137	0.90301
		3	3/22/16-5/24/16	2	4	141	157	162	159.3				0.571114	0.511335	0.646847
		3	5/24/16-9/11/16	2	5	223	151	163	158.8				0.740086	0.677181	0.815974
		3	9/11/16-12/12/16	2	6	184	154	164	159.1				0.851935	0.772877	0.949152
		3	12/12/16-3/22/17	2	7	203	156	164	159.2				0.746633	0.680383	0.827289
		3	3/22/17-7/10/17	2	8	225	155	161	158.5				0.692819	0.634173	0.763511
		3	7/10/17-11/13/17	2	9	167	155	161	158.4				0.640363	0.578264	0.717522
Sodium, mmol/L	2	3	9/1/15-11/20/15	1	1	181	157	162	159.6				0.618276	0.56047	0.689481		0.639382	0.617926	0.662393
		3	11/20/15-2/6/16	1	2	169	156	169	159.8				0.866523	0.782945	0.970235
		3	2/6/2016-3/22/16	1	3	91	157	163	160.1				0.722727	0.630819	0.846232
		3	3/22/16-5/23/16	2	4	131	157	162	159.3				0.665605	0.593597	0.757653
		3	5/23/2016-9/13/16	2	5	230	156	162	158.9				0.593123	0.54342	0.652912
		3	9/13/16-3/2/17	2	6	345	157	162	159.3				0.53718	0.499865	0.580563
		3	3/2/17-6/20/17	2	7	227	156	162	159.1				0.551862	0.505337	0.607896
		3	6/20/17-9/12/17	2	8	165	157	161	158.7				0.567986	0.512604	0.636889
		3	9/12/17-10/10/17	2	9	62	157	170	159.5				0.90158	0.766128	1.09567
Sodium, mmol/L	3	3	9/1/15-11/5/15	1	1	136	155	163	159.9				0.825469	0.737653	0.937206		0.837446	0.808385	0.86869
		3	11/5/15-2/2/16	1	2	193	154	165	160.2				0.840519	0.764198	0.933908
		3	2/2/16-3/22/16	1	3	104	151	163	159.2				1.10888	0.975928	1.2841
		3	3/22/16-4/19/16	2	4	53	155	161	158.8				0.744829	0.625175	0.921558
		3	4/19/16-8/18/16	2	5	246	157	163	159.7				0.645178	0.592759	0.707846
		3	8/18/16-11/10/16	2	6	176	152	161	158.8				0.698395	0.632262	0.780101
		3	11/10/16-5/26/17	2	7	230	152	162	158.6				0.856641	0.784855	0.942993
		3	5/26/17-8/28/17	2	8	169	154	164	157.9				0.960934	0.868249	1.07595
		3	8/28/17-12/5/17	2	9	187	155	161	158.5				0.896641	0.814045	0.998038
